# Supplementary material for: Breast cancer survival and stage at diagnosis in Australia, Canada, Denmark, Norway, Sweden and the UK, 2000-2007: a population-based study
Source: PubMed Central journal article supplement — Br J Cancer. 2013 Feb 28;108(5):1195–208. doi: 10.1038/bjc.2013.6 (PMC3619080; doi:10.1038/bjc.2013.6), 2013-02-28
Supplement: bjc20136x1.pdf [file bjc20136x1.pdf]

**Additional file 1. Stage-specific sets of weights used for age standardisation of breast cancer estimates**

| TNM stage     |              |         | SEER Summary Stage 2000 |              |         |
|---------------|--------------|---------|-------------------------|--------------|---------|
|               | Age category | Weights |                         | Age category | Weights |
| All patients  | 15-44        | 0.11    | All patients            | 15-44        | 0.11    |
|               | 45-54        | 0.21    |                         | 45-54        | 0.22    |
|               | 55-64        | 0.26    |                         | 55-64        | 0.27    |
|               | 65-74        | 0.20    |                         | 65-74        | 0.20    |
|               | 75-84        | 0.16    |                         | 75-84        | 0.15    |
|               | 85-99        | 0.07    |                         | 85-99        | 0.06    |
| TNM stage I   | 15-44        | 0.09    | Localised               | 15-44        | 0.10    |
|               | 45-54        | 0.23    |                         | 45-54        | 0.22    |
|               | 55-64        | 0.33    |                         | 55-64        | 0.30    |
|               | 65-74        | 0.22    |                         | 65-74        | 0.21    |
|               | 75-84        | 0.10    |                         | 75-84        | 0.13    |
|               | 85-99        | 0.02    |                         | 85-99        | 0.03    |
| TNM stage II  | 15-44        | 0.13    | Regional                | 15-44        | 0.15    |
|               | 45-54        | 0.23    |                         | 45-54        | 0.25    |
|               | 55-64        | 0.25    |                         | 55-64        | 0.26    |
|               | 65-74        | 0.19    |                         | 65-74        | 0.18    |
|               | 75-84        | 0.15    |                         | 75-84        | 0.13    |
|               | 85-99        | 0.04    |                         | 85-99        | 0.03    |
| TNM stage III | 15-44        | 0.14    | Distant                 | 15-44        | 0.09    |
|               | 45-54        | 0.21    |                         | 45-54        | 0.17    |
|               | 55-64        | 0.21    |                         | 55-64        | 0.23    |
|               | 65-74        | 0.18    |                         | 65-74        | 0.21    |
|               | 75-84        | 0.18    |                         | 75-84        | 0.21    |
|               | 85-99        | 0.08    |                         | 85-99        | 0.09    |
| TNM stage IV  | 15-44        | 0.08    | Missing stage           | 15-44        | 0.08    |
|               | 45-54        | 0.15    |                         | 45-54        | 0.15    |
|               | 55-64        | 0.20    |                         | 55-64        | 0.20    |
|               | 65-74        | 0.23    |                         | 65-74        | 0.17    |
|               | 75-84        | 0.25    |                         | 75-84        | 0.22    |
|               | 85-99        | 0.09    |                         | 85-99        | 0.18    |
| Missing stage | 15-44        | 0.09    |                         |              |         |
|               | 45-54        | 0.16    |                         |              |         |
|               | 55-64        | 0.19    |                         |              |         |
|               | 65-74        | 0.17    |                         |              |         |
|               | 75-84        | 0.23    |                         |              |         |
|               | 85-99        | 0.17    |                         |              |         |
