# Supplementary material for: Breast cancer survival and stage at diagnosis in Australia, Canada, Denmark, Norway, Sweden and the UK, 2000-2007: a population-based study
Source: PubMed Central journal article supplement — Br J Cancer. 2013 Feb 28;108(5):1195–208. doi: 10.1038/bjc.2013.6 (PMC3619080; doi:10.1038/bjc.2013.6), 2013-02-28
Supplement: bjc20136x2.pdf [file bjc20136x2.pdf]

**Additional file 2. Age-standardised three-year net survival for women diagnosed with breast cancer during 2000-7 by stage at diagnosis and country, using known stage and imputed stage: TNM (upper figure) and SEER Summary Stage 2000 (lower figure)**

**TNM stage**

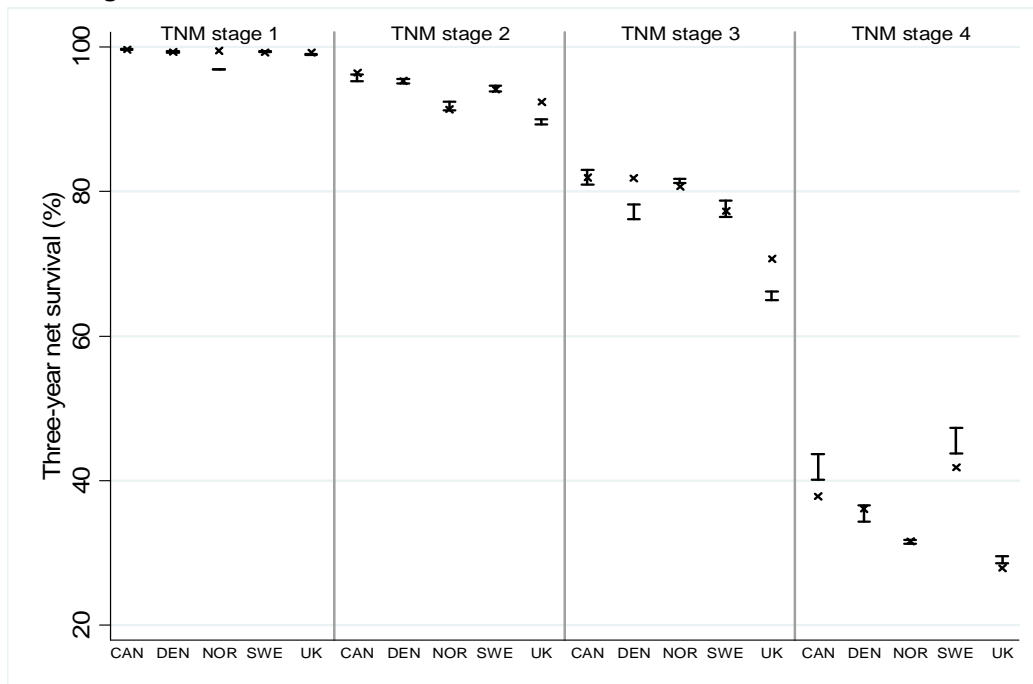

**SEER Summary Stage 2000**

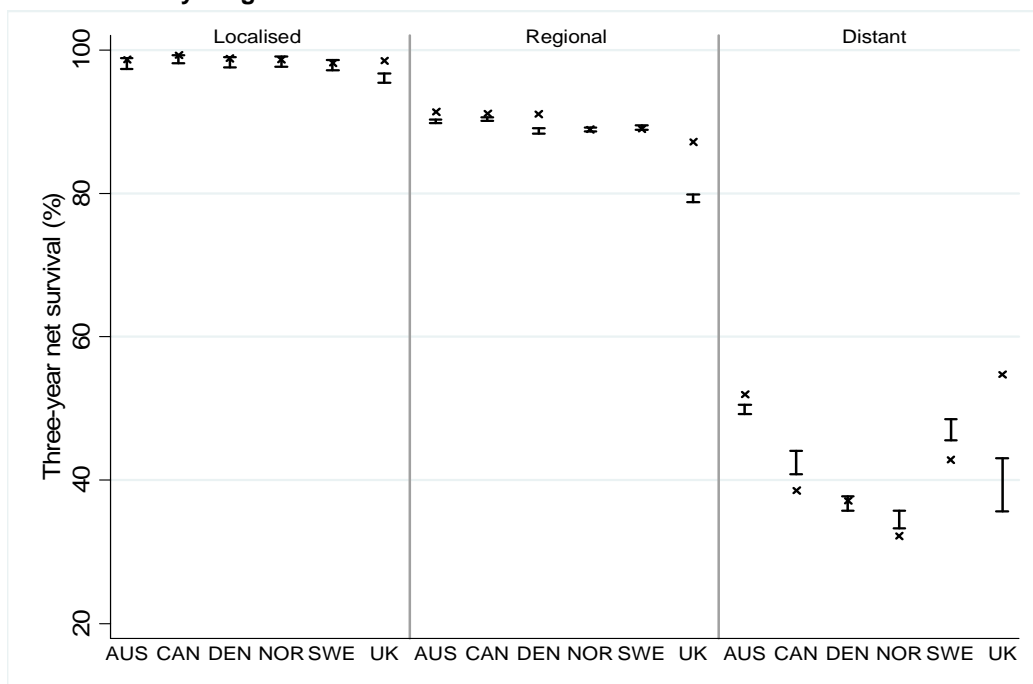

X survival estimate derived from women with known stage  
 I range of survival estimates derived for all women after imputation of stage where it was missing (see text)

**Notes:**

Denmark and Norway: national data; Australia: New South Wales; Canada: British Columbia and Manitoba; Sweden: Uppsala-Örebro and Stockholm-Gotland health regions; UK (TNM analysis): data from Northern Ireland, Wales and the Northern and Yorkshire Cancer Registry and Information Service, Eastern Cancer Registration and Information Centre, Oxford Cancer Intelligence Unit, West Midlands Cancer Intelligence Unit in England; UK (SEER analysis): Northern Ireland and Wales. In Denmark we analysed women diagnosed during 2004-7
